# Supplementary material for: Increased Local Testosterone Levels Alter Human Fallopian Tube mRNA Profile and Signaling
Source: MDPI journal article supplement (doi:10.3390/cancers15072062), 2023-03-30
Supplement: s1 [file s1]

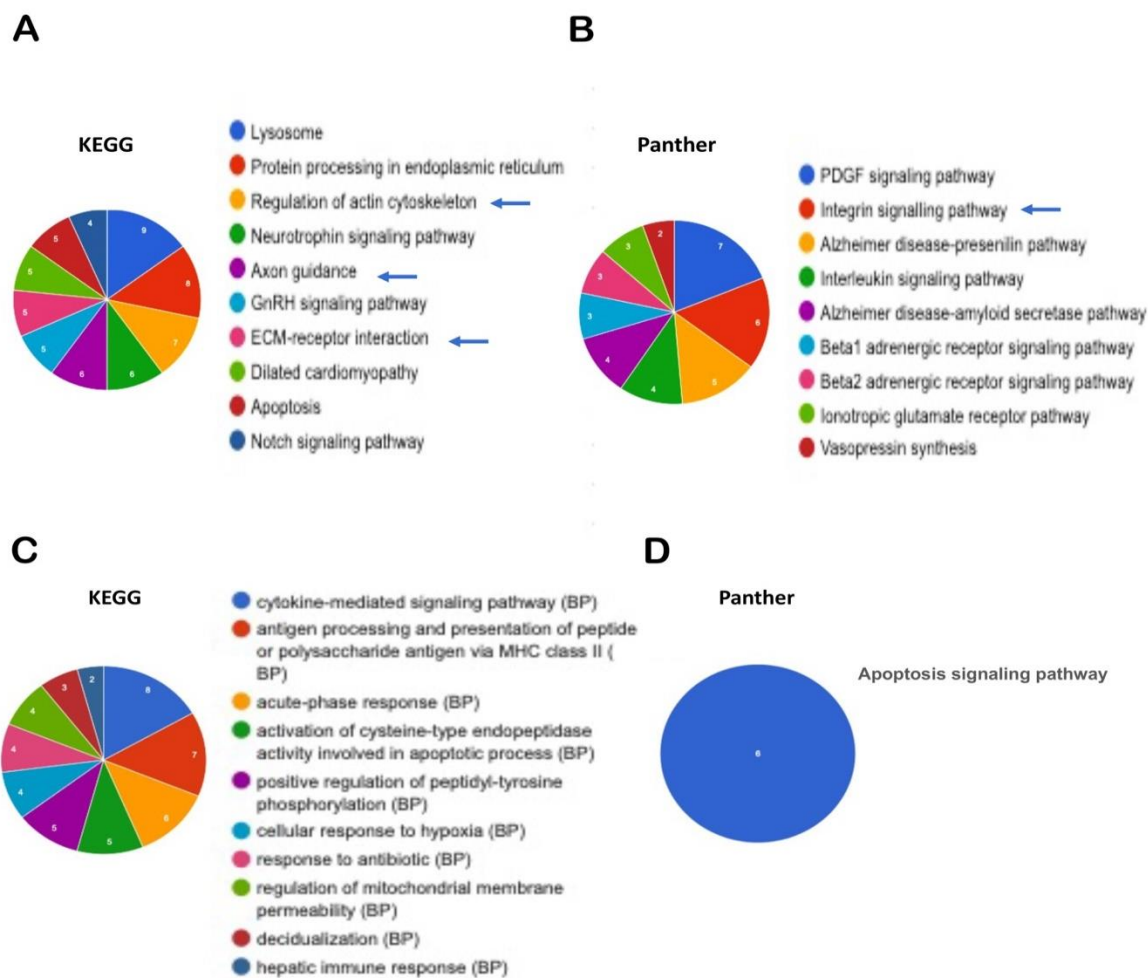

**Figure S1.** Pathway analysis of genes regulated by testosterone. A-B) Upregulated genes. B-C) Downregulated genes.

**A**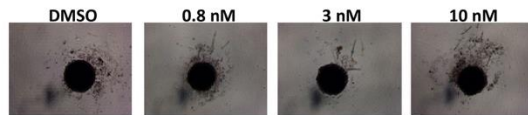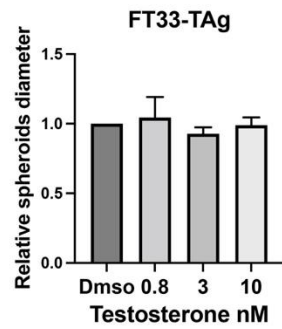**B**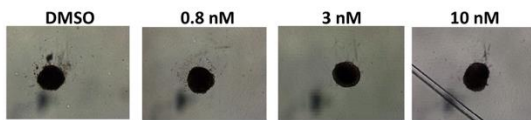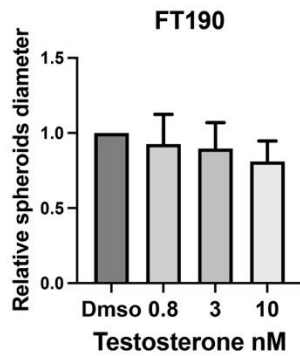

**Figure S2.** Effect of testosterone on spheroids size. A) FT33-TAg cells were seeded in ULA plates and grown for 10 days before taking pictures. Three independent experiments were performed and quantified using Image J to measure the diameter. One-Way Anova was performed with no significant differences. B) Same as A conducted in FT190 cells.

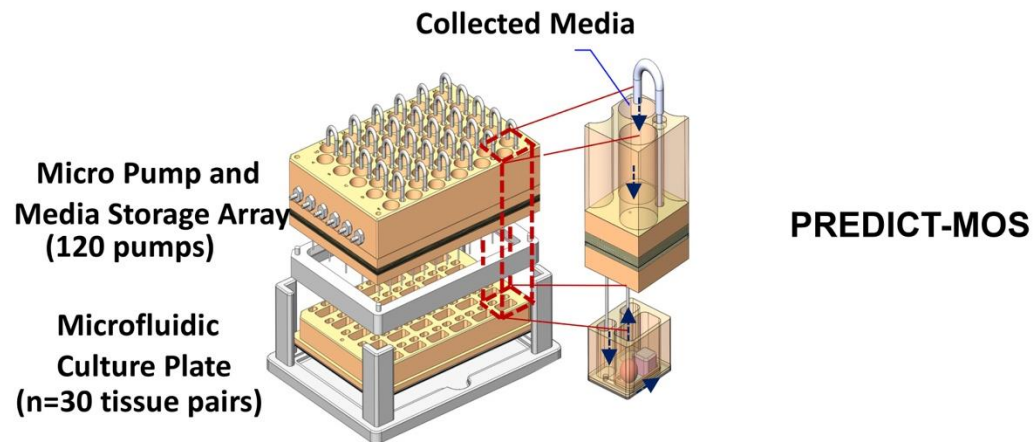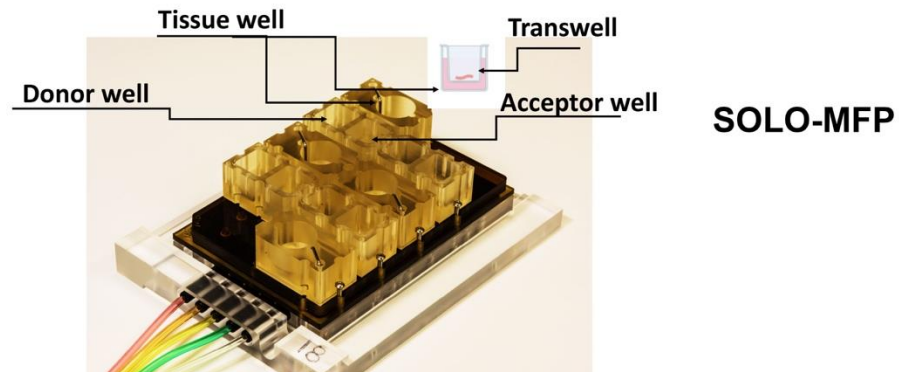

**Figure S3.** PREDICT-MOS vs. SOLO microfluidic platform. Schematic of the PREDICT-MOS and the SOLO-MFP systems. Top panel shows the novel PREDICT system with the 30-tissue-well format. Bottom panel shows the older system SOLO-MFP with limited number of tissue-wells (about 4).

Table S1

| Primers         | forward                  | reverse                  |
|-----------------|--------------------------|--------------------------|
| <i>PIKB</i>     | ATCCAGAGTTCAGCTGCCA      | CTCTTTTGCATCTTCCTTCAC    |
| <i>STEAP4v1</i> | GCTTGGTAGCTCTGGGATTT     | TTGCCTGGGTAACGGTTAAG     |
| <i>STEAP4v3</i> | TCCAGTCCAAACTGGGTATT     | GATTTGAAGGGCTGAGGAATCT   |
| <i>ZBTB16</i>   | TGTTTGAGATCCTCTCCACCGC   | TCTCCAGCATCTTCAGGCACTGT  |
| <i>KIF5C</i>    | GCCGAATGCAGCATCAAA       | TTCCCTTGCCCGATCAC        |
| <i>TP53</i>     | AGCCAAGTCTGTGACTTGCA     | AACCTCCGTCATGTGCTGT      |
| <i>P21</i>      | AAATCGTCCAGCGACCTTCCTCAT | TCTGACTCCTTGTTCCGCTGCTAA |
| <i>CD82</i>     | ATCTCTGTCCTGCAAACCTCCTCC | GAAGCCCATGAGCATAGTG      |
| <i>PAX2</i>     | TGTGTCAGCAAAATCCTGG      | CGGGTTCTGTCGTTTGTATTC    |
| <i>LAMA2</i>    | AGTCCTCAGGTGGAAGATAG     | ACATGACAGTGGAGATGTTG     |
| <i>LGR6</i>     | ACGGCTTACCTGGACCTCA      | GCTTGTCTGGGATGTGTGA      |
| <i>WNT4</i>     | GAGCAACTGGCTGTACCTGG     | TTCTCCTTCAGTGCGTGACC     |
| <i>18S</i>      | GCTTGCGTTGATTAAGTCCC     | GCCTCACTAAACCATCCAATC    |

Table S2

| Antibodies | Company     | Catalog#   |
|------------|-------------|------------|
| LGR6       | ProteinTech | 17658-I-AP |
| WNT4       | Abcam       | ab91226    |
